# Supplementary material for: MeReO3/Al2O3 and Me4Sn-activated Re2O7/Al2O3 alkene metathesis catalysts have similar active sites
Source: Royal Society of Chemistry journal article supplement (doi:10.1039/c4cy01710b), 2015-01-01
Supplement: c4cy01710b1.pdf [file c4cy01710b1.pdf]

**MeReO<sub>3</sub>/Al<sub>2</sub>O<sub>3</sub> and Me<sub>4</sub>Sn-activated Re<sub>2</sub>O<sub>7</sub>/Al<sub>2</sub>O<sub>3</sub> Alkene  
Metathesis Catalysts Have Similar Active Sites**

Maxence Valla, Matthew P. Conley, Christophe Copéret\*.

*Department of Chemistry and Applied Biosciences, ETH Zürich, Vladimir Prelog*

*Weg. 2, 8093 Zurich, Switzerland.*

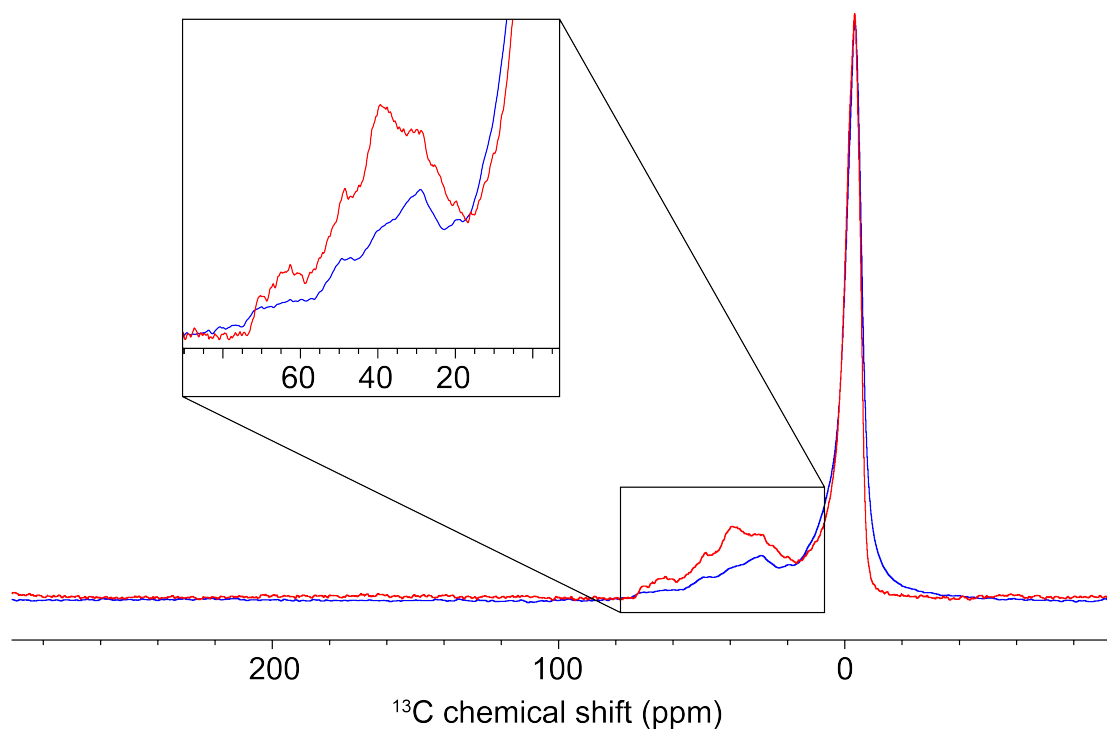

Figure S1:  $^{13}\text{C}$  CPMAS spectra of  $2\text{-}^{13}\text{C}\text{-Me}_4\text{Sn/Re}_2\text{O}_7/\text{Al}_2\text{O}_3$ , 80 k scans, 400 MHz (Red line) and  $2\text{-}^{13}\text{C}\text{-Me}_4\text{Sn/Re}_2\text{O}_7/\text{Al}_2\text{O}_3$ , contacted with an excess of non-labelled propylene, 80 k scans, 400 MHz. For all the spectra the contact time was set to 0.6 ms and the recycling delay was 1 sec.

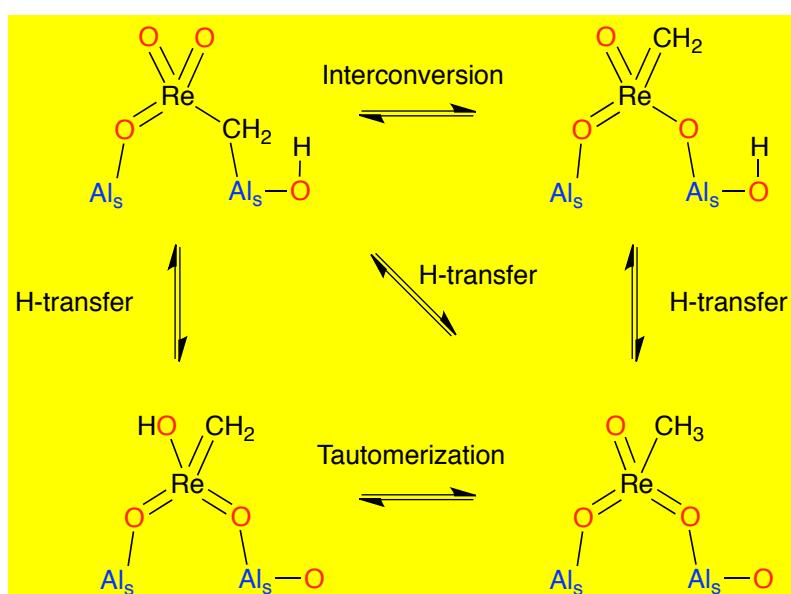

Scheme S1: Reaction scheme of the possible interconversion between the methylene, the alkylidene and the oxo-species through tautomerization or H-transfer.
